# Supplementary material for: A fast synthetic route to GDP-sugars modified at the nucleobase
Source: Royal Society of Chemistry journal article supplement (doi:10.1039/b714379f), 2007-10-17
Supplement: b714379f.pdf [file b714379f.pdf]

## A Fast Synthetic Route to GDP-Sugars Modified at the Nucleobase

Alice Collier and Gerd Wagner

Centre for Carbohydrate Chemistry, School of Chemical Sciences and Pharmacy, University of East Anglia, Norwich, NR4 7TJ, UK.

Fax +44(0)1603 592003; Tel: +44 (0)1603 593889; E-mail: [g.wagner@uea.ac.uk](mailto:g.wagner@uea.ac.uk)

- (i) General
- (ii) 8-Phenylguanosine monophosphate (**3**)
- (iii) 8-Phenylguanosine diphosphate mannose (**4a**)
- (iv) 8-(4-Chlorophenyl)guanosine diphosphate mannose (**4b**)
- (v) 8-(4-Methylphenyl)guanosine diphosphate mannose (**4c**)
- (vi) 8-(Furan-2-yl)guanosine diphosphate mannose (**4d**)
- (vii) 8-(Pyren-1-yl)guanosine diphosphate mannose (**4e**)
- (viii) 8-Bromoguanosine diphosphate mannose (**5**)
- (ix) 8-Bromoguanosine diphosphate (**6**)

**(i) General.** All chemicals were obtained commercially and used as received unless stated otherwise. Chelex 100 resin was purchased from Sigma ([www.sigmaaldrich.com](http://www.sigmaaldrich.com)) and used in the sodium form as purchased. TLC was performed on precoated aluminium plates (Silica Gel 60 F<sub>254</sub>, Merck). Compounds were visualized by exposure to UV light. NMR spectra were recorded at 298 K on a Varian VXR 400 S spectrometer at 400 MHz (<sup>1</sup>H), or on a Bruker Avance DPX-300 spectrometer at 300 MHz (<sup>1</sup>H), or on a Varian Inova spectrometer at 500 MHz (<sup>1</sup>H). Chemical shifts ( $\delta$ ) are reported in ppm and referenced to acetone (<sup>1</sup>H  $\delta$  2.05, <sup>13</sup>C  $\delta$  30.83 for solutions in D<sub>2</sub>O). Coupling constants ( $J$ ) are reported in Hz. Resonance allocations were made with the aid of COSY experiments. Accurate electrospray ionisation mass spectra (HR ESI-MS) were obtained on a Finnigan MAT 900 XLT mass spectrometer at the EPSRC National Mass Spectrometry Service Centre, Swansea. Analytical chromatography (HPLC) was carried out on an Agilent 1200 machine equipped with a Supelcosil LC-18T column (25cm  $\times$  4.6mm, particle size 5 $\mu$ m); gradient: MeOH against 0.1M KH<sub>2</sub>PO<sub>4</sub>; detection (diode array detector): 254 / 280 nm. Preparative chromatography was performed on a Biologic LP chromatography system equipped with a peristaltic pump and a 254nm UV Optics Module under the following conditions:

**Purification method 1** – Ion-pair chromatography was performed using Lichroprep RP-18 resin, gradient 0 – 15 % MeCN against 0.05 M TEAB over 400 mL, flow rate 3 mL/min. Product containing fractions were combined and reduced to dryness. The residue was co-evaporated repeatedly with methanol to remove residual TEAB (triethylammonium bicarbonate).

**Purification method 2** – Anion exchange chromatography was performed using a Macro prep 25Q 5 mL cartridge, gradient 0 – 100 % 1M TEAB (pH 7.3) against H<sub>2</sub>O over 20 column volumes. Product containing fractions were combined and reduced to dryness. The residue was co-evaporated repeatedly with methanol to remove residual TEAB (triethylammonium bicarbonate).

8-Bromoguanosine (**1**) and 8-bromo GMP (**2**) were prepared as previously reported.<sup>1</sup> For the cross-coupling of nucleotides and sugar-nucleotides, the following general procedures were applied:

**General procedure A – Suzuki-Miyaura coupling of sugar-nucleotides.** Na<sub>2</sub>Cl<sub>4</sub>Pd (2.5 mol %), TPPTS (2.5 eq. to Pd), K<sub>2</sub>CO<sub>3</sub> (1.5 eq.) and arylboronic acid (1.2 eq.) were placed in a flask and purged with N<sub>2</sub>. A solution of 8-bromo GDP-mannose **5** (1 eq.) in degassed water (3 mL) was added via a syringe. The pale yellow solution was stirred at 80°C under N<sub>2</sub> for 1h. Upon completion of the reaction, the solution turned dark red/brown. The reaction was cooled to room temperature and the pH adjusted to 7 with 1 % HCl solution. All solvents were removed *in vacuo* and the crude material was purified by chromatography.

**General procedure B – One-pot, two-step bromination / cross-coupling of nucleotides and sugar-nucleotides.** To a solution of the nucleotide or sugar-nucleotide (1 eq.) in 0.5 M NaOAc buffer (0.5 mL, pH 4.0)<sup>2</sup> was added saturated bromine water dropwise until the yellow colour persisted. After stirring at rt for 20 min the solution was extracted with CHCl<sub>3</sub> (3 x 5 mL) and the aqueous layer was dried *in vacuo*. A solution of Na<sub>2</sub>Cl<sub>4</sub>Pd (2.5 mol %), TPPTS (2.5 eq. to Pd), PhB(OH)<sub>2</sub> (1.2 eq.) and K<sub>2</sub>CO<sub>3</sub> (3 eq.) in degassed H<sub>2</sub>O (3 mL) was added, and the yellow solution was stirred under N<sub>2</sub> at 80°C for 1h. Upon completion of the reaction, the pH was adjusted to 7 with 1 % HCl, all solvents were removed *in vacuo*, and the crude material was purified by chromatography.

In our experience, purification of the cross-coupling products by chromatography (cf. purification methods 1 and 2), followed by treatment with Chelex 100 resin, was sufficient to remove any residual Pd.

(ii) **8-Phenylguanosine monophosphate (3).**

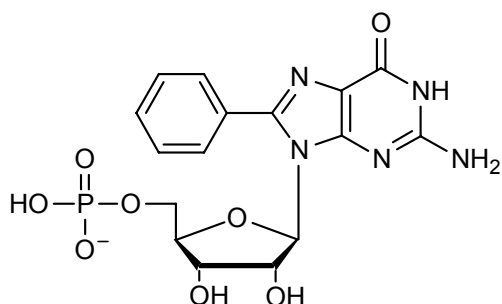

**3** was prepared either from 8-bromo GMP (**2**) as previously reported,<sup>1</sup> or from GMP (50.4 mg, 0.124 mmol) and phenylboronic acid according to general procedure B. From general procedure B, and after purification by ion pair chromatography (method 1), **3** was obtained as the triethylammonium salt in 75% yield (51.9 mg, 1.2 eq. of TEA as shown by NMR).  $\delta_{\text{H}}$  (400 MHz, D<sub>2</sub>O) 7.38 – 7.29 (5H, m, 5Ph), 5.56 (1H, d,  $J = 6.0$ , H-1'), 5.02 (1H, t,  $J = 5.9$ , H-2'), 4.28 (1H, dd,  $J = 3.6, 5.7$ , H-3'), 4.02 – 3.90 (3H, m, H-4' + H<sub>2</sub>-5'), 2.97 (7H, q,  $J = 7.3$ , CH<sub>2</sub>), 1.05 (10H, t,  $J = 7.3$ , CH<sub>3</sub>).  $\delta_{\text{C}}$  (100 MHz, D<sub>2</sub>O) 159.2, 153.8, 153.3, 150.9, 131.1, 129.8, 129.5, 128.3, 116.6, 89.6, 84.1 (d,  $J_{\text{C,P}} = 8.4$ ), 71.0, 70.7, 65.2 (d,  $J_{\text{C,P}} = 4.6$ ), 47.2, 8.8.  $\delta_{\text{P}}$  (162 MHz, D<sub>2</sub>O) 7.43;  $m/z$  (ESI) 438.0820 (monoanion, C<sub>16</sub>H<sub>17</sub>O<sub>8</sub>N<sub>5</sub>P requires 438.0813).

(iii) **8-Phenylguanosine diphosphate mannose (4a).**

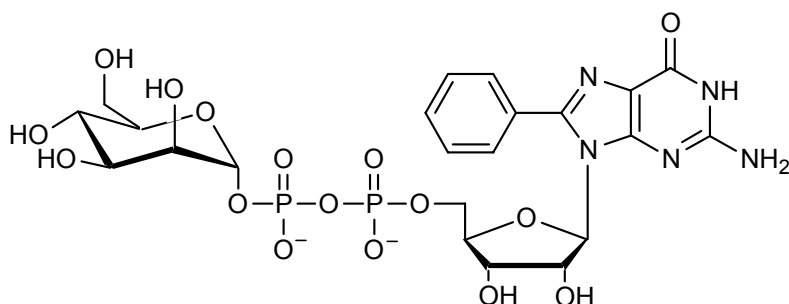

From 8-phenylguanosine monophosphate **3** – **4a** was prepared from **3**<sup>1</sup> (50.0 mg, 0.09 mmol) and mannose-1-phosphate<sup>3</sup> according to the method used for the synthesis of **5**. After purification by anion exchange chromatography (method 2) and treatment with Chelex 100 resin (Na<sup>+</sup> form), **4a** was obtained as a glassy solid in 40% yield (26.4 mg).

From 8-bromoguanosine diphosphate mannose **5** – **4a** was prepared from **5** (16.9 mg, 0.025 mmol) and phenylboronic acid according to general procedure A. After purification by ion pair chromatography (method 1, fractions 28-29) and treatment with Chelex 100 resin (Na<sup>+</sup> form), **4a** was obtained as a glassy solid in 48% yield (11.0 mg).

From guanosine diphosphate mannose – **4a** was prepared from guanosine diphosphate mannose (10.0 mg, 0.016 mmol) and phenylboronic acid according to general procedure B. The crude

residue was purified first by ion pair chromatography (method 1) and then on an anion exchange cartridge (method 2). The glassy residue obtained from repeated evaporations with MeOH was dissolved in H<sub>2</sub>O and treated with Chelex 100 resin (Na<sup>+</sup> form) to give **4a** as the sodium salt in 44% yield (6.2 mg).  $\delta_{\text{H}}$  (400 MHz; D<sub>2</sub>O) 7.38 (5H, m, phenyl), 5.61 (1H, d,  $J = 6.1$ , H-1'), 5.35 (1H, d,  $J = 7.8$ , H-1''), 5.12 (1H, t,  $J = 5.9$ , H-2'), 4.36 (1H, dd,  $J = 3.3, 5.6$ , H-3'), 4.15 (1H, m, H-5'a), 4.06 (2H, m, H-4', H-5'b), 3.89 (1H, m, H-2''), 3.76 (1H, dd,  $J = 3.4, 9.7$ , H-3''), 3.70 (2H, m, H-5'', H-6''a), 3.54 (2H, m, H-6''b, H-4'');  $\delta_{\text{C}}$  (100 MHz; D<sub>2</sub>O) 160.7, 159.4, 153.7, 152.8, 150.1, 130.4, 129.2, 128.8, 127.8, 116.0, 96.2 (d,  $J_{\text{C,P}} = 7.9$ ), 88.7, 83.0 (d,  $J_{\text{C,P}} = 11.5$ ), 73.4, 70.0 (d,  $J_{\text{C,P}} = 11.9$ ), 69.6, 66.2, 65.0 (d,  $J_{\text{C,P}} = 7.1$ ), 60.5, 58.7;  $\delta_{\text{P}}$  (121 MHz; D<sub>2</sub>O) -7.75 (d,  $J = 20.4$  Hz), -10.18 (d,  $J = 21.4$ );  $m/z$  (ESI) 680.1012 (monoanion, C<sub>22</sub>H<sub>28</sub>N<sub>5</sub>O<sub>16</sub>P<sub>2</sub> requires 680.1012).

(iv) **8-(4-Chlorophenyl)guanosine diphosphate mannose (4b).**

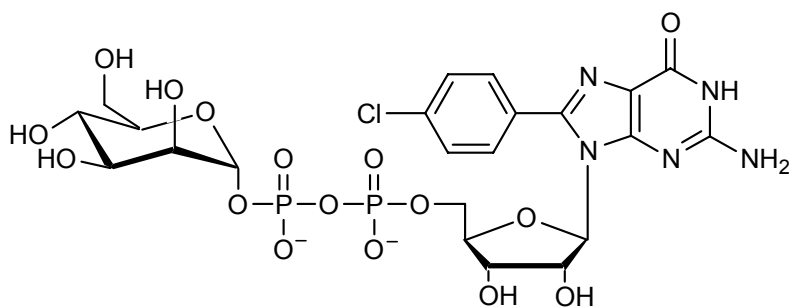

**4b** was prepared from **5** (15.9 mg, 0.022 mmol) and 4-chlorophenylboronic acid according to general procedure A. After purification by ion pair chromatography (method 1, fractions 41-48) and treatment with Chelex 100 resin (Na<sup>+</sup> form), **4b** was obtained as a glassy solid in 82% yield (13.3 mg).  $\delta_{\text{H}}$  (400 MHz; D<sub>2</sub>O) 7.39 (4H, s, phenyl), 5.58 (1H, d,  $J = 6.3$ , H-1'), 5.34 (1H, d,  $J = 7.9$ , H-1''), 5.18 (1H, t,  $J = 6.0$ , H-2'), 4.40 (1H, dd,  $J = 3.3, 5.7$ , H-3'), 4.16 (1H, m, H-5'a), 4.04 (2H, d,  $J = 7.8$ , H-4', H-5'b), 3.88 (1H, m, H-2''), 3.75 (1H, dd,  $J = 3.4, 9.8$ , H-3''), 3.69 (2H, m, H-5'', H-6''a), 3.56 (1H, dd,  $J = 5.9, 12.8$ , H-6''b), 3.50 (1H, t,  $J = 9.8$ , H-4'');  $\delta_{\text{C}}$  (125 MHz; D<sub>2</sub>O) 130.4, 128.7, 96.0, 88.4, 82.9, 73.2, 69.8, 69.4, 66.0, 64.8, 60.4;  $\delta_{\text{P}}$  (121 MHz; D<sub>2</sub>O) -7.67 (d,  $J = 21.1$  Hz), -10.09 (d,  $J = 20.3$ );  $m/z$  (ESI) 714.0621 (monoanion, C<sub>22</sub>H<sub>27</sub><sup>35</sup>ClN<sub>5</sub>O<sub>16</sub>P<sub>2</sub> requires 714.0622).

(v) **8-(4-Methylphenyl)guanosine diphosphate mannose (4c).**

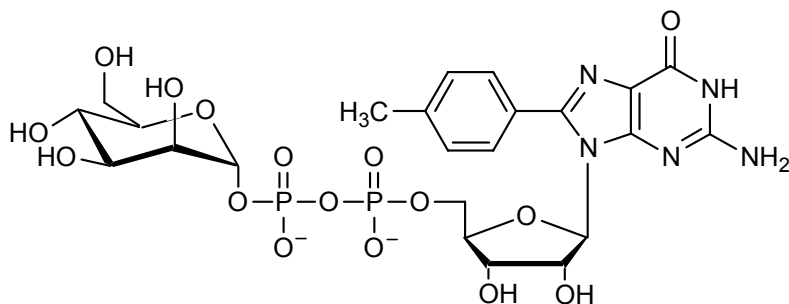

**4c** was prepared from **5** (15.7 mg, 0.022 mmol) and 4-methylphenylboronic acid according to general procedure A. After purification by ion pair chromatography (method 1, fractions 38-42) and treatment with Chelex 100 resin (Na<sup>+</sup> form), **4c** was obtained as a glassy solid in 82% yield (13.1 mg).  $\delta_{\text{H}}$  (400 MHz; D<sub>2</sub>O) 7.33 (2H, d,  $J = 8.2$ , phenyl), 7.22 (2H, d,  $J = 8.4$ , phenyl), 5.61 (1H, d,  $J = 6.3$ , H-1'), 5.35 (1H, d,  $J = 7.9$ , H-1''), 5.16 (1H, t,  $J = 6.0$ , H-2'), 4.39 (1H, dd,  $J = 3.3, 5.6$ , H-3'), 4.15 (1H, m, H-5'a), 4.04 (2H, m, H-4', H-5'b), 3.88 (1H, dd,  $J = 2.0, 3.3$ , H-2''), 3.75 (1H, dd,  $J = 3.4, 9.8$ , H-3''), 3.68 (2H, m, H-5'', H-6''a), 3.54 (2H, m, H-6''b, H-4''), 2.25 (3H, s, methyl);  $\delta_{\text{C}}$  (125 MHz; D<sub>2</sub>O) 129.0, 128.8, 95.9, 88.4, 82.8, 73.0, 69.7, 69.4, 66.1, 64.7, 60.2, 20.0;  $\delta_{\text{P}}$  (121 MHz; D<sub>2</sub>O) -7.64 (d,  $J = 21.2$  Hz), -10.09 (d,  $J = 20.3$ );  $m/z$  (ESI) 694.1171 (monoanion, C<sub>23</sub>H<sub>30</sub>N<sub>5</sub>O<sub>16</sub>P<sub>2</sub> requires 694.1168).

(vi) **8-(Furan-2-yl)guanosine diphosphate mannose (4d).**

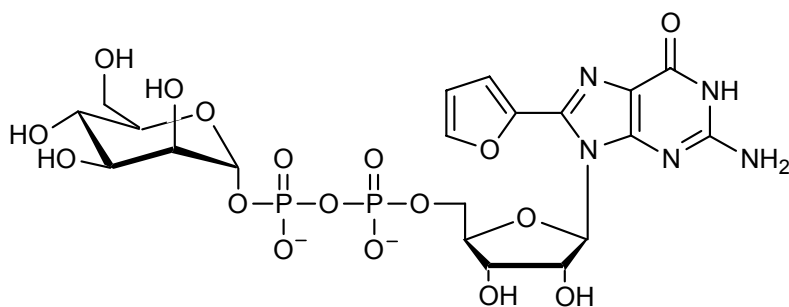

**4d** was prepared from **5** (16.2 mg, 0.022 mmol) and furan-2-ylboronic acid according to general procedure A. After purification by ion pair chromatography (method 1, fractions 27-31) and treatment with Chelex 100 resin (Na<sup>+</sup> form), **4d** was obtained as a glassy solid in 57% yield (11.5 mg).  $\delta_{\text{H}}$  (400 MHz; D<sub>2</sub>O) 7.58 (1H, d,  $J = 1.6$ , furanyl), 6.90 (1H, d,  $J = 3.5$ , furanyl), 6.51 (1H, dd,  $J = 1.8, 3.5$ , furanyl), 6.03 (1H, d,  $J = 6.1$ , H-1'), 5.34 (1H, d,  $J = 7.9$ , H-1''), 5.24 (1H, t,  $J = 5.9$ , H-2'), 4.47 (1H, dd,  $J = 3.2, 8.8$ , H-3'), 4.10 (3H, m, H-4', H<sub>2</sub>-5'), 3.88 (1H, m, H-2''), 3.75 (1H, dd,  $J = 3.4, 9.7$ , H-3''), 3.69 (2H, m, H-5'', H-6''a), 3.53 (2H, m, H-6''b, H-4'');  $\delta_{\text{P}}$  (121 MHz; D<sub>2</sub>O) -7.67 (d,  $J = 20.4$  Hz), -10.10 (d,  $J = 21.3$ );  $m/z$  (ESI) 670.0798 (monoanion, C<sub>20</sub>H<sub>26</sub>N<sub>5</sub>O<sub>17</sub>P<sub>2</sub> requires 670.0804).

**(vii) 8-(Pyren-1-yl)guanosine diphosphate mannose (4e).**

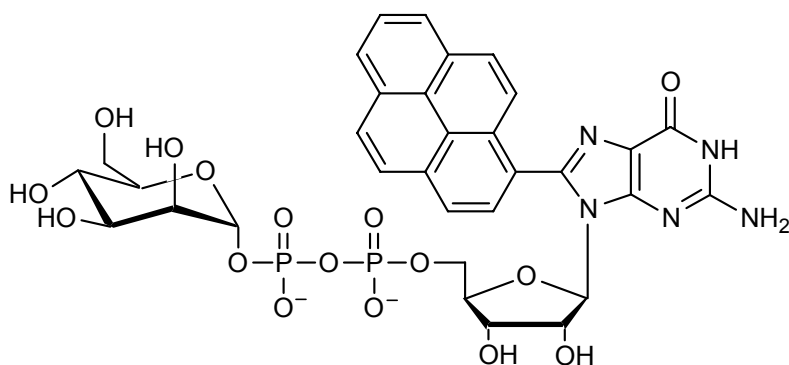

**4e** was prepared from **5** (15.5 mg, 0.021 mmol) and pyrene-1-boronic acid according to general procedure A. After purification by ion pair chromatography (method 1, fractions 87-88) and treatment with Chelex 100 resin (Na<sup>+</sup> form), **4e** was obtained as a glassy solid in 73% yield (10.6 mg).  $\delta_{\text{H}}$  (400 MHz; D<sub>2</sub>O) 7.97 (9H, m), 5.32 (2H, m), 4.27 (1H, m), 4.07 (2H, m), 3.86 (3H, m), 3.75 (1H, m), 3.68 (2H, m), 3.53 (2H, m);  $\delta_{\text{P}}$  (121 MHz; D<sub>2</sub>O) -7.69 (d,  $J = 20.8$  Hz), -10.11 (d,  $J = 20.3$ );  $m/z$  (ESI) 804.1331 (monoanion, C<sub>32</sub>H<sub>32</sub>N<sub>5</sub>O<sub>16</sub>P<sub>2</sub> requires 804.1325).

**(viii) 8-Bromoguanosine Diphosphate mannose (5).**

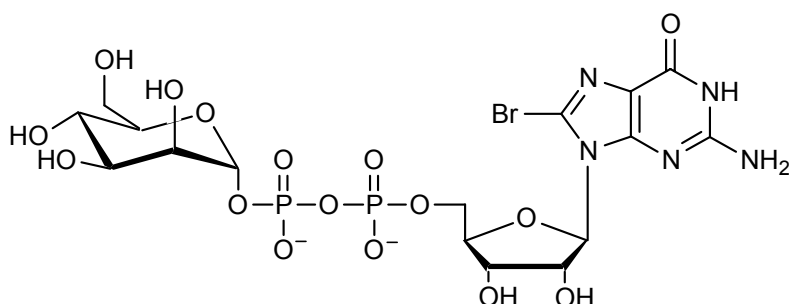

8-bromoguanosine monophosphate<sup>1</sup> (155.6 mg, 0.20 mmol) was dissolved in dry DMSO (0.5 mL) and co-evaporated with dry DMF (3 x 2 mL). Morpholine was added (105  $\mu$ L, 1.20 mmol) and the reaction was stirred at rt for 5 min. Dipyriddy disulfide (134.7 mg, 0.61 mmol) was added and stirring continued for 5 min. Finely ground triphenylphosphine (160.9 mg, 0.61 mmol) was added and stirring continued for 2 hr. The product phosphoromorpholidate was precipitated by dropwise addition of 0.1 M NaI solution in acetone. The white precipitate was collected by filtration and washed with acetone. The crude morpholidate was then used without further purification. The morpholidate and mannose-1-phosphate<sup>3</sup> (triethylammonium salt; 77 mg, 0.18 mmol) were dissolved in dry pyridine (5 mL) and evaporated to dryness several times. MgSO<sub>4</sub> (42 mg, 0.35 mmol) and dry 0.2 M MnCl<sub>2</sub> in formamide (0.4 mL) were added and the solution stirred at rt under N<sub>2</sub> for six days. The product sugar-nucleotide was precipitated by dropwise addition of MeCN, and the supernatant was removed. The red oily residue was purified by anion

exchange chromatography (method 2). The thin film obtained was dissolved in H<sub>2</sub>O (5 mL) and treated with Chelex 100 resin (Na<sup>+</sup> form). The resin was filtered off and washed with water. The combined filtrate was reduced to dryness to yield 70.4 mg (56 %) of **5** as a glassy solid.  $\delta_{\text{H}}$  (400 MHz; D<sub>2</sub>O) 5.79 (1H, d,  $J = 6.2$ , H-1'), 5.34 (1H, d,  $J = 7.8$ , H-1''), 5.16 (1H, t,  $J = 5.9$ , H-2'), 4.47 (1H, dd,  $J = 3.3, 5.5$ , H-3'), 4.12 (2H, m, H-4', H-5'a), 4.04 (1H, m, H-5'b), 3.88 (1H, dd,  $J = 2.0, 3.2$ , H-2''), 3.75 (1H, dd,  $J = 3.4, 9.8$ , H-3''), 3.69 (2H, m, H-5'', H-6''a), 3.55 (2H, m, H-6''b, H-4'');  $\delta_{\text{C}}$  (100 MHz; D<sub>2</sub>O) 157.5, 153.2, 152.6, 123.8, 116.5, 96.1 (d,  $J_{\text{c,p}} = 5.7$  Hz), 89.3, 83.3 (d,  $J_{\text{c,p}} = 9.2$  Hz), 73.4, 70.3, 70.0 (d,  $J_{\text{c,p}} = 9.3$  Hz), 69.8, 69.5, 66.1, 64.9 (d,  $J_{\text{c,p}} = 5.4$  Hz), 60.4;  $\delta_{\text{P}}$  (121 MHz; D<sub>2</sub>O) -7.92 (d,  $J = 20.7$  Hz), -10.27 (d,  $J = 21.7$ );  $m/z$  (ESI) 681.9796 (monoanion, C<sub>16</sub>H<sub>23</sub><sup>79</sup>BrN<sub>5</sub>O<sub>16</sub>P<sub>2</sub> requires 681.9804).

(ix) **8-Phenylguanosine-diphosphate (6).**

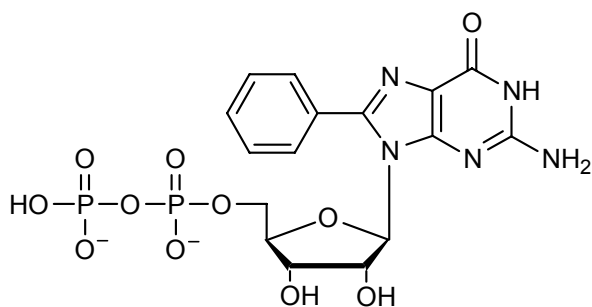

**6** was prepared from GDP (10.0 mg, 0.020 mmol) and phenylboronic acid according to general procedure B. After purification by ion pair chromatography (method 1) and anion exchange chromatography (method 2) and treatment with Chelex 100 resin (Na<sup>+</sup> form), **6** was obtained as a glassy solid in 50% yield (9.0 mg).  $\delta_{\text{H}}$  (400 MHz; D<sub>2</sub>O) 7.47 (5H, m, phenyl), 5.60 (1H, d,  $J = 5.7$ , H-1'), 5.09 (1H, t,  $J = 5.8$ , H-2'), 4.52 (1H, m, H-3'), 4.06 (3H, m, H-4', 2× H-5');  $\delta_{\text{P}}$  (121 MHz; D<sub>2</sub>O) -2.42 (d,  $J = 22.0$  Hz), -6.83 (d,  $J = 22.3$ ).  $m/z$  (ESI) 518.0485 (monoanion, C<sub>16</sub>H<sub>18</sub>N<sub>5</sub>O<sub>11</sub>P<sub>2</sub> requires 518.0484).

References

- <sup>1</sup>A. Collier and G. K. Wagner, *Org. Biomol. Chem.*, 2006, **24**, 4526.
- <sup>2</sup>T. S. Lin, J. C. Cheng, K. Ishiguro and A. C. Sartorelli, *J. Med. Chem.*, 1985, **28**, 1481.
- <sup>3</sup>G. M. Watt, S. L. Flitsch, S. Fey, L. Elling and U. Kragl, *Tetrahedron Asymmetry*, 2000, **11**, 621.
